# Supplementary material for: Cetuximab and IL-15 Promote NK and Dendritic Cell Activation In Vitro in Triple Negative Breast Cancer
Source: PubMed Central journal article supplement (PMC7408037; doi:10.3390/cells9071573), 2020-06-28
Supplement: cells-09-01573-s001.pdf [file cells-09-01573-s001.pdf]

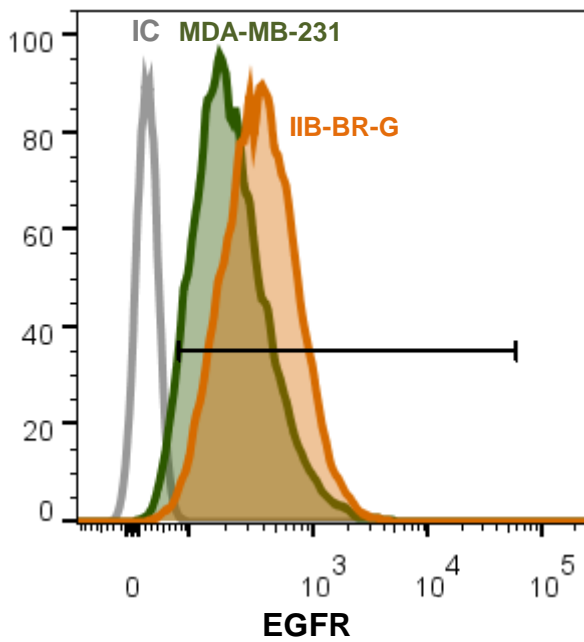

**Supplementary Figure 1.** EGFR expression in TNBC cell lines used in this study. EGFR expression in IIB-BR-G and MDA-MB-231 cell lines was evaluated by flow cytometry, after incubating cells with Cetuximab during 30min at 4°C, washing, and staining with polyclonal rabbit anti-human IgA/IgG/IgM/Kappa/Lambda conjugated with FITC (Dako) for 30min at 4°C.

**(A)** Co-culture: DCs+NK cells

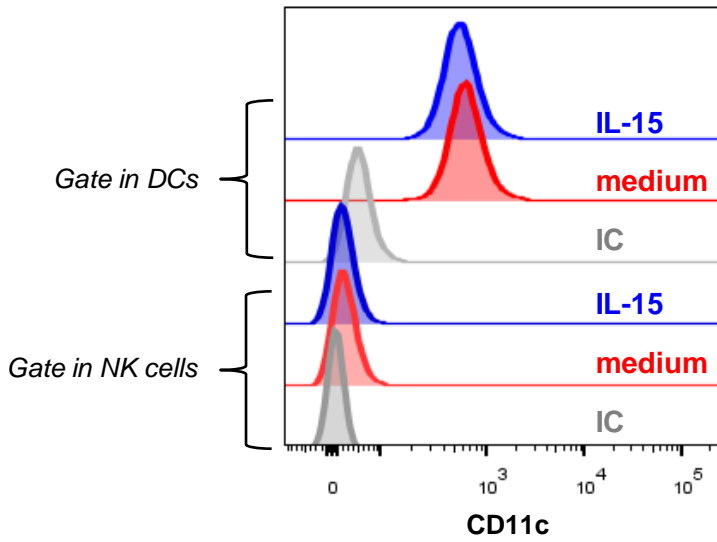

**(B)**

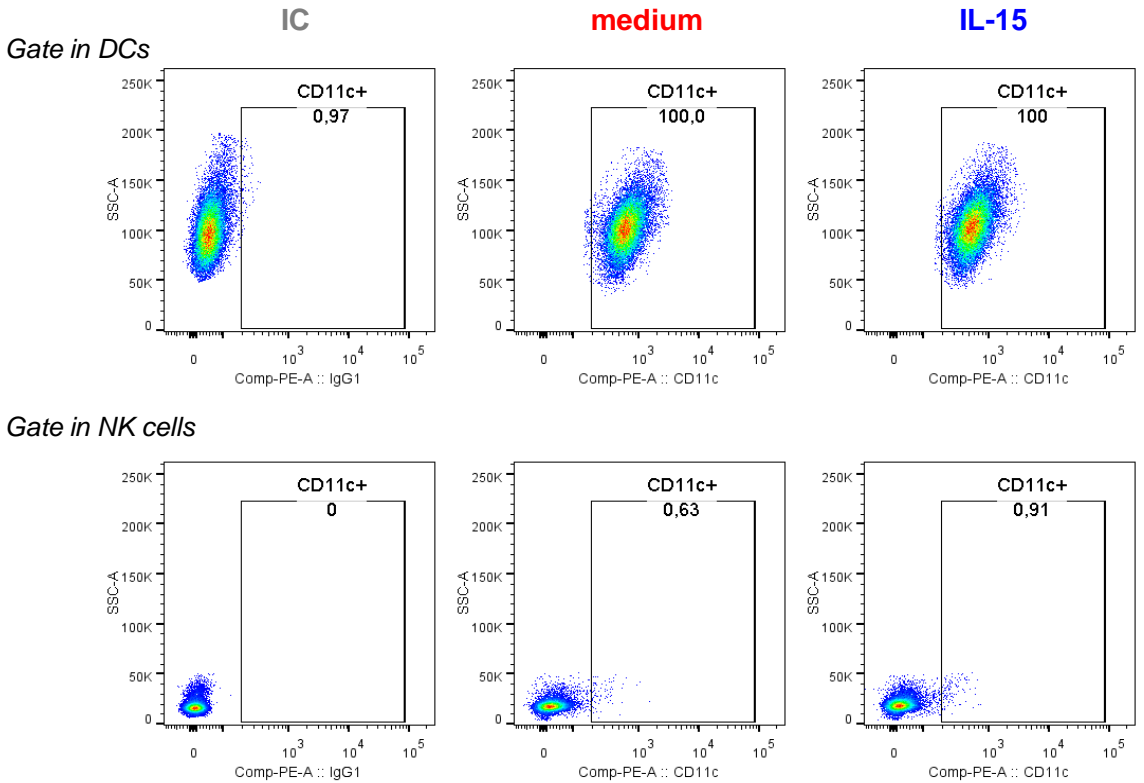

**Supplementary Figure 2.** Expression of CD11 in DCs and NK cells. DCs and NK cells were co-cultured in the absence or presence of 10 ng/ml IL-15 for 24hs.

**(A)** Representative histograms showing the expression of CD11c on both cell types.

**(B)** Representative pseudocolor graphs showing the expression of CD11c on both cell types.

## Controls at 4°C

Co-culture:

DCs plus

IIB-BR-G+  
Cetuximab

IIB-BR-G+  
Cetuximab+  
NK

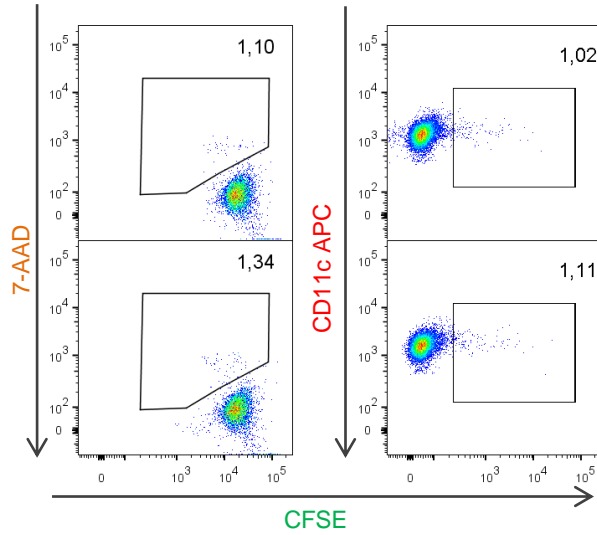

**Supplementary Figure 3.** Cytotoxicity of IIB-BR-G cells and their uptake by DCs after a co-culture of DCs with IIB-BR-G plus Cetuximab, in the absence or presence of NK cells, for 4 hours at 4°C. Representative graphs showing one of three experiments carried out independently.

**(A)** *Gate in NK cells*

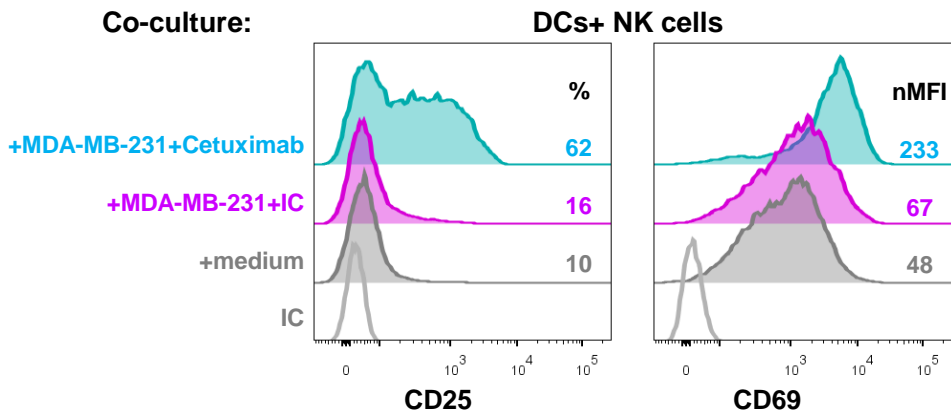

**(B)** *Gate in DCs*

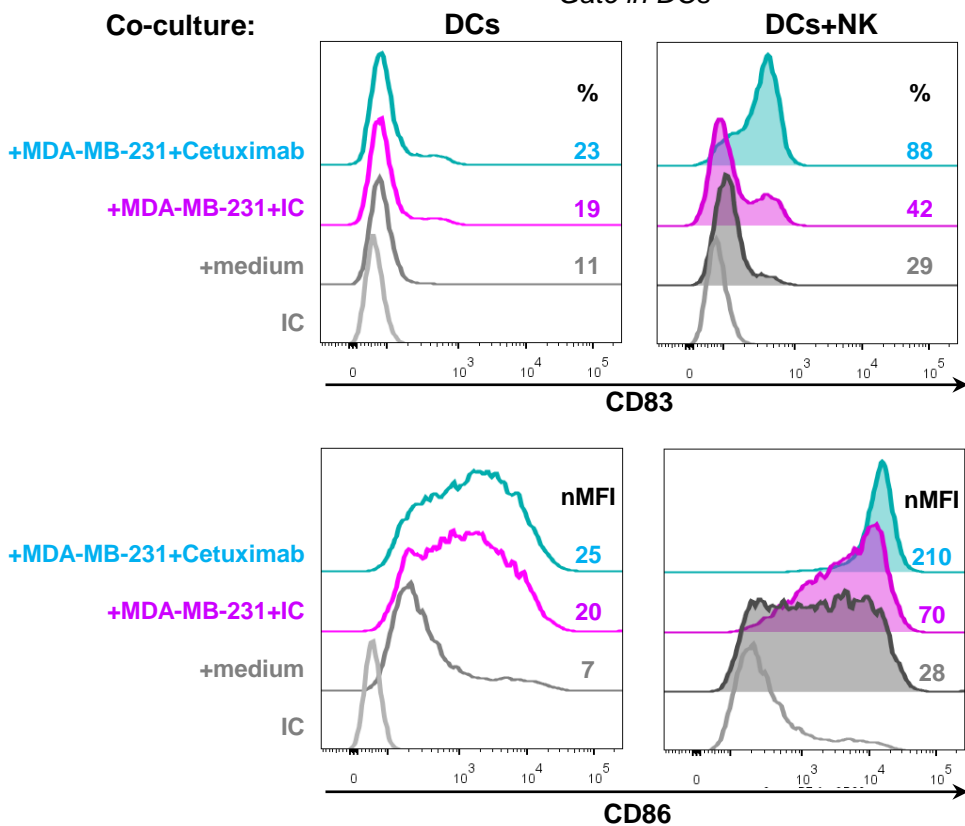

**Supplementary Figure 4.** NK cell activation and DC maturation against MDA-MD-231 cells coated with Cetuximab. DCs were co-cultured with MDA-MD-231 cells opsonized with IC or Cetuximab, in the absence or presence of NK cells, in a DCs:NK:MDA-MD-231 ratio of 1:1:1 for 24h. Representative histograms showing one of two experiments performed independently. %: percentage of positive cells, nMFI: normalized geometric mean fluorescence intensity.

(A) NK cell activation was enhanced by Cetuximab opsonization of MDA-MD-231 cells.

(B) NK cells promoted DC maturation when MDA-MD-231 cells were coated with Cetuximab.

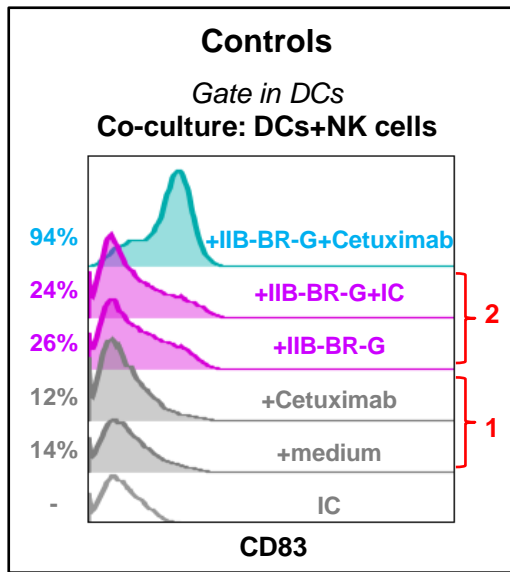

**Supplementary Figure 5.** Expression of CD83 in controls. DCs co-cultured with NK cells, with the addition of medium or Cetuximab (Key 1), IIB-BR-G with medium or opsonized with IC (Key 2) or Cetuximab, during 24 hours. Representative histograms showing one of two experiments performed independently.

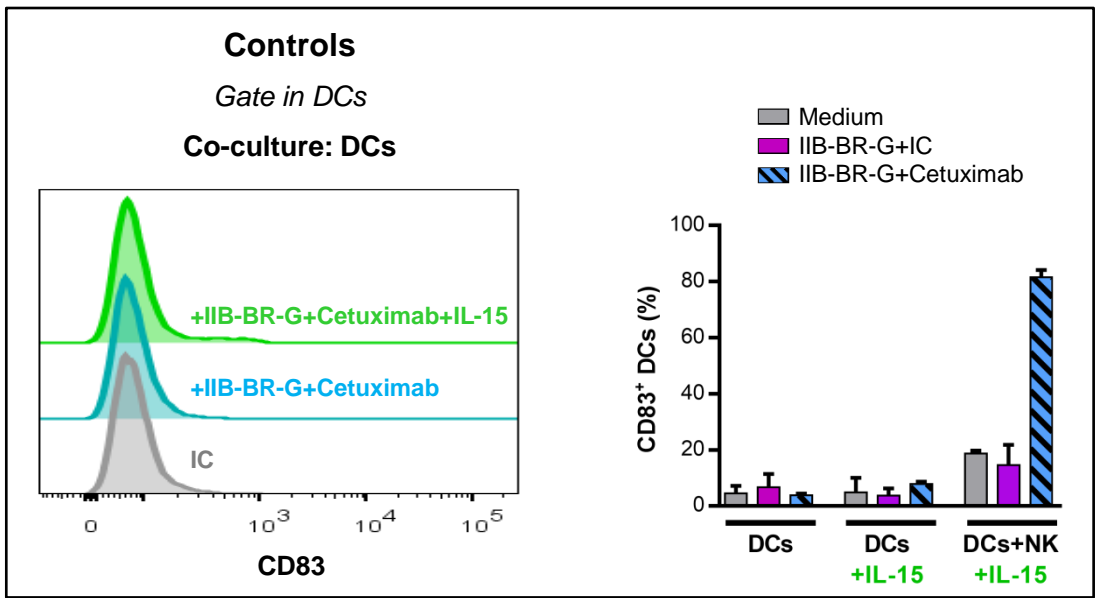

**Supplementary Figure 6.** Effect of IL-15 in the absence of NK cells. Expression of CD83 in DCs after co-culture with IIB-BR-G cells opsonized with Cetuximab without NK cells, in the absence (DCs) or presence of 10 ng/ml IL-15 (DCs+IL-15) for 24 hours. (A) Representative histograms of one of two experiments performed independently. (B) As control, co-culture in the presence of NK cells and IL-15 (DC+NK+IL-15) is shown (n= 2).
